# Supplementary material for: Quantitative assessment of background parenchymal enhancement in breast magnetic resonance images predicts the risk of breast cancer
Source: PubMed Central journal article supplement (PMC5354686; doi:10.18632/oncotarget.13538), 2016-11-24
Supplement: oncotarget-08-10620-s001.pdf [file oncotarget-08-10620-s001.pdf]

## Quantitative assessment of background parenchymal enhancement in breast magnetic resonance images predicts the risk of breast cancer

### SUPPLEMENTARY TABLES

Supplementary Table S1: Tumor size data for cancer patients

| Tumor size | Premenopausal(N=47) | menopausal(N=54) |
|------------|---------------------|------------------|
| <2cm       | 10                  | 15               |
| ≥2cm, ≤5cm | 32                  | 39               |
| >5cm       | 5                   | 0                |

Supplementary Table S2: Comparisons of AUC for the discrimination between breast cancer and benign tissue by FGT

| Menopause status | Cancer vs Normal |            |              |              | Cancer vs Benign |            |       |       |
|------------------|------------------|------------|--------------|--------------|------------------|------------|-------|-------|
|                  | Cancer (%)       | Normal (%) | P            | AUC          | Cancer (%)       | Benign (%) | P     | AUC   |
| Premenopausal    | 16.4             | 17.3       | 0.689        | 0.524        | 16.4             | 17.0       | 0.768 | 0.518 |
| Postmenopausal   | 9.4              | 8.0        | <b>0.035</b> | <b>0.618</b> | 9.4              | 10.7       | 0.749 | 0.482 |

FGT, fibroglandular tissue
